# Supplementary material
Source: PubMed Central journal article supplement (PMC4069388)
Supplement: ismej2013246x1.pdf [file ismej2013246x1.pdf]

## Supplementary Information

**Reference strains.** The *Epsilonproteobacteria* used as reference strains in this study were: *Caminibacter mediatlanticus* DSM 16658 (Voordeckers *et al*, 2005), *Caminibacter* sp. strain TB-1 (Voordeckers *et al*, 2005), *Nautilia* spp. strains MT3, MT4, and MT5 (Voordeckers *et al*, 2008), *Nautilia nitratireducens* DSM 22087 (Perez-Rodriguez *et al*, 2010), *Caminibacter hydrogeniphilus* DSM 14510 (Alain *et al*, 2002), *Caminibacter profundus* DSM 15016 (Miroshnichenko *et al*, 2004), *Hydrogenimonas thermophila* JCM 11971 (Takai *et al*, 2004), *Thioreductor micantisoli* DSM 16661 (Nakagawa *et al*, 2005a), *Nitratiruptor tergaricus* (Nakagawa *et al*, 2005b), *Nitratifractor salsuginis* (Nakagawa *et al*, 2005b), *Sulfurimonas paralvinellae* DSM 17229 (Takai *et al*, 2006) and *Sulfurovum lithotrophicum* (Inagaki *et al*, 2004).

## References

- Alain K, Querellou J, Lesongeur F, Pignet P, Crassous P, Raguene G *et al* (2002). *Caminibacter hydrogeniphilus* gen. nov., sp. nov., a novel thermophilic, hydrogen-oxidizing bacterium isolated from an East Pacific Rise hydrothermal vent. *International Journal of Systematic and Evolutionary Microbiology* **52**: 1317-1323.
- Galtier N, Gouy M, Gautier C (1996). SeaView and Phylo\_win, two graphic tools for sequence alignment and molecular phylogeny. *Comput. Applic. Biosci* **12**: 543-548.
- Miroshnichenko ML, L'Haridon S, Schumann P, Spring S, Bonch-Osmolovskaya EA, Jeanthon C *et al* (2004). *Caminibacter profundus* sp. nov., a novel thermophile of *Nautiliales* ord. nov. within the class 'Epsilonproteobacteria', isolated from a deep-sea hydrothermal vent. *Int J Syst Evol Microbiol* **54**: 41-5.
- Nakagawa S, Inagaki F, Takai K, Horikoshi K, Sako Y (2005a). *Thioreductor micantisoli* gen. nov., sp. nov., a novel mesophilic, sulfur-reducing chemolithoautotroph within the epsilon-Proteobacteria isolated from hydrothermal sediments in the Mid-Okinawa Trough. *Int J Syst Evol Microbiol* **55**: 599-605.
- Nakagawa S, Takai K, Inagaki F, Horikoshi K, Sako Y (2005b). *Nitratiruptor tergaricus* gen. nov., sp. nov. and *Nitratifractor salsuginis* gen. nov., sp. nov., nitrate-reducing

chemolithoautotrophs of the epsilon-Proteobacteria isolated from a deep-sea hydrothermal system in the Mid-Okinawa Trough. *Int J Syst Evol Microbiol* **55**: 925-33.

Perez-Rodriguez I, Ricci J, Voordeckers JW, Starovoytov V, Vetriani C (2010). *Nautilia nitratreducens* sp. nov., a thermophilic, anaerobic, chemosynthetic, nitrate-ammonifying bacterium isolated from a deep-sea hydrothermal vent. *International Journal of Systematic and Evolutionary Microbiology* **60**: 1182-6.

Takai K, Nealson KH, Horikoshi K (2004). *Hydrogenimonas thermophila* gen. nov., sp. nov., a novel thermophilic, hydrogen-oxidizing chemolithoautotroph within the epsilon-Proteobacteria, isolated from a black smoker in a Central Indian Ridge hydrothermal field. *Int J Syst Evol Microbiol* **54**: 25-32.

Takai K, Suzuki M, Nakagawa S, Miyazaki M, Suzuki Y, Inagaki F *et al* (2006). *Sulfurimonas paralvinellae* sp. nov., a novel mesophilic, hydrogen- and sulfur-oxidizing chemolithoautotroph within the Epsilonproteobacteria isolated from a deep-sea hydrothermal vent polychaete nest, reclassification of *Thiomicrospira denitrificans* as *Sulfurimonas denitrificans* comb. nov. and emended description of the genus *Sulfurimonas*. *Int J Syst Evol Microbiol* **56**: 1725-33.

Thompson JD, Gibson TJ, Plewniak F, Jeanmougin F, Higgins DG (1997). The CLUSTAL\_X windows interface: flexible strategies for multiple sequence alignment aided by quality analysis tools. *Nucleic Acids Res* **25**: 4876-82.

Voordeckers J, Starovoytov V, Vetriani C (2005). *Caminibacter mediatlanticus* sp. nov., a thermophilic, chemolithoautotrophic, nitrate ammonifying bacterium isolated from a deep-sea hydrothermal vent on the Mid-Atlantic Ridge. *Int J Syst Evol Microbiol* **55**: 773-779.

Voordeckers JW, Do M, Hügler M, Ko V, Sievert SM, Vetriani C (2008). Culture dependent and independent analyses of 16S rRNA and ATP citrate lyase genes: a comparison of microbial communities from different black smoker chimneys on the Mid-Atlantic Ridge. *Extremophiles* **12**: 627-640.

## Legend to Supplementary Figures

**Figure S1.** Total RNA from cultures of *Caminibacter* spp. grown under nitrate-reducing conditions (A). Lane 1: *C. mediatlanticus*; lane 2: *C. profundus*. Detection of *napA* transcripts by RT-PCR (B): lane 1: 100 bp ladder; lane 2: negative control (no RT); lane 3: *napA* reverse transcript from *C. mediatlanticus*; lane 4: *napA* reverse transcript from *C. profundus*.

**Figure S2.** Rarefaction curves of the *napA* libraries from the four sampling sites. The curves were generated using Analytic Rarefaction 1.3, kindly provided by Steven M. Holland (<http://www.uga.edu/%7Estrata/software/Software.html>).
