# Supplementary material
Source: PubMed Central journal article supplement (PMC4069388)
Supplement: ismej2013246x4.pdf [file ismej2013246x4.pdf]

Table S1. Metabolic characteristics of vent *Epsilonproteobacteria* used as reference strains in this study

| Reference Organism <sup>a</sup>     | Isolation Site <sup>b</sup>         | Optimum Temperature (°C) | End Product of Nitrate Respiration | Electron donors                                                               | Electron acceptors                                                                                                           | References                          |
|-------------------------------------|-------------------------------------|--------------------------|------------------------------------|-------------------------------------------------------------------------------|------------------------------------------------------------------------------------------------------------------------------|-------------------------------------|
| <i>Sulfurovum lithotrophicum</i>    | MOT, Iheya, sediments               | 28-30                    | N <sub>2</sub>                     | S <sub>2</sub> O <sub>3</sub> <sup>2-</sup> , S <sup>0</sup>                  | NO <sub>3</sub> <sup>-</sup> , O <sub>2</sub>                                                                                | Inagaki <i>et al</i> , 2004         |
| <i>Sulfurimonas paralvinellae</i>   | MOT, Iheya, <i>Paralvinella</i> sp. | 30                       | N <sub>2</sub>                     | H <sub>2</sub> , S <sub>2</sub> O <sub>3</sub> <sup>2-</sup> , S <sup>0</sup> | NO <sub>3</sub> <sup>-</sup> , O <sub>2</sub>                                                                                | Takai <i>et al</i> , 2006           |
| <i>Thioreductor micantisoli</i>     | MOT, Iheya, sediments               | 32                       | NH <sub>4</sub> <sup>+</sup>       | H <sub>2</sub>                                                                | NO <sub>3</sub> <sup>-</sup> , S <sup>0</sup>                                                                                | Nakagawa <i>et al</i> , 2005a       |
| <i>Nitratifractor salsuginis</i>    | MOT, Iheya, chimney                 | 37                       | N <sub>2</sub>                     | H <sub>2</sub>                                                                | NO <sub>3</sub> <sup>-</sup> , O <sub>2</sub>                                                                                | Nakagawa <i>et al</i> , 2005b       |
| <i>Nitratiruptor tergarcus</i>      | MOT, Iheya, chimney                 | 55                       | N <sub>2</sub>                     | H <sub>2</sub>                                                                | NO <sub>3</sub> <sup>-</sup> , S <sup>0</sup> , O <sub>2</sub>                                                               | Nakagawa <i>et al</i> , 2005b       |
| <i>Nautilia</i> spp. MT3, MT4, MT5  | EPR, 9°N, chimney                   | 45-50                    | NH <sub>4</sub> <sup>+</sup>       | H <sub>2</sub>                                                                | NO <sub>3</sub> <sup>-</sup>                                                                                                 | Voordeckers <i>et al</i> , 2008     |
| <i>Nautilia nitratireducens</i>     | EPR, 9°N, chimney                   | 55                       | NH <sub>4</sub> <sup>+</sup>       | H <sub>2</sub> , formate, acetate                                             | NO <sub>3</sub> <sup>-</sup> , S <sup>0</sup> , S <sub>2</sub> O <sub>3</sub> <sup>2-</sup> , SeO <sub>4</sub> <sup>2-</sup> | Perez-Rodriguez <i>et al</i> , 2010 |
| <i>Hydrogenimonas thermophila</i>   | CIR, Kairei Field, colonizer        | 55                       | NH <sub>4</sub> <sup>+</sup>       | H <sub>2</sub>                                                                | NO <sub>3</sub> <sup>-</sup> , S <sup>0</sup> , O <sub>2</sub>                                                               | Takai <i>et al</i> , 2004           |
| <i>Caminibacter profundus</i>       | MAR, Rainbow, vent cap              | 55                       | NH <sub>4</sub> <sup>+</sup>       | H <sub>2</sub>                                                                | NO <sub>3</sub> <sup>-</sup> , S <sup>0</sup> , O <sub>2</sub>                                                               | Miroshnichenko <i>et al</i> , 2004  |
| <i>Caminibacter mediatlanticus</i>  | MAR, Rainbow, chimney               | 55                       | NH <sub>4</sub> <sup>+</sup>       | H <sub>2</sub>                                                                | NO <sub>3</sub> <sup>-</sup> , S <sup>0</sup>                                                                                | Voordeckers <i>et al</i> , 2005     |
| <i>Caminibacter</i> sp. TB-1        | MAR, Rainbow, chimney               | 50                       | NH <sub>4</sub> <sup>+</sup>       | H <sub>2</sub>                                                                | NO <sub>3</sub> <sup>-</sup> , S <sup>0</sup>                                                                                | Voordeckers <i>et al</i> , 2005     |
| <i>Caminibacter hydrogeniphilus</i> | EPR, 13°N, <i>A. pompeyana</i>      | 60                       | NH <sub>4</sub> <sup>+</sup>       | H <sub>2</sub>                                                                | NO <sub>3</sub> <sup>-</sup> , S <sup>0</sup>                                                                                | Alain <i>et al</i> , 2002           |

<sup>a</sup> All organisms are chemolithoautotrophs.

<sup>b</sup> MOT: Mid-Okinawa Trough; EPR: East Pacific Rise; CIR: Central Indian Ridge; MAR: Mid-Atlantic Ridge.
