# Supplementary material
Source: PubMed Central journal article supplement (PMC4069388)
Supplement: ismej2013246x5.pdf [file ismej2013246x5.pdf]

Table S2. Accession numbers of the genomes of reference strains used to reconstruct the *nap* gene clusters

| <b>Organism</b>                                         | <b>Genome accession number</b> |
|---------------------------------------------------------|--------------------------------|
| <i>Wolinella succinogenes</i> DSM 1740                  | NC_005090                      |
| <i>Caminibacter mediatlanticus</i> TB-2                 | NZ_ABCJ000000000               |
| <i>Nitratiruptor</i> sp. SB155                          | NC_009662                      |
| <i>Sulfurovum</i> sp. NBC37                             | NC_009663                      |
| <i>Sulfurimonas autotrophica</i> DSM 16294              | NC_014506                      |
| <i>Sulfurimonas denitrificans</i> DSM 1215              | NC_007575                      |
| <i>Nautilia profundicola</i> AmH                        | NC_012115                      |
| <i>Nitratifractor salsuginis</i> DSM 16511              | NC_014935                      |
| <i>Campylobacter jejuni</i> subsp. <i>jejuni</i> 81-176 | NC_008787                      |
