# Supplementary material
Source: PubMed Central journal article supplement (PMC4069388)
Supplement: ismej2013246x6.pdf [file ismej2013246x6.pdf]

Table S3. Locations of sampling stations, sample characteristics, and clone libraries constructed in this study

| Vent <sup>a</sup>            | Cruise/Dive #                                                        | Latitude  | Longitude  | Depth (m) | Sample type; Temperature <sup>b</sup> [H <sub>2</sub> S] <sup>c</sup>            | Designations of <i>napA</i> libraries |
|------------------------------|----------------------------------------------------------------------|-----------|------------|-----------|----------------------------------------------------------------------------------|---------------------------------------|
| Rainbow, MAR                 | R/V <i>Atlantis</i><br>Cruise AT 05-03<br>DSV <i>Alvin</i> Dive 3678 | 36° 14' N | 33° 54' W  | 2305      | Sulfide chimney;<br>158°C                                                        | MAR sulfide                           |
| <i>Alvinella</i> Pillar, EPR | R/V <i>Atlantis</i><br>Cruise AT 11-26<br>DSV <i>Alvin</i> Dive 4112 | 9° 50' N  | 104° 17' W | 2500      | Fluids; 40°C                                                                     | EPR AP fluid                          |
| East Wall, EPR               | R/V <i>Atlantis</i><br>Cruise AT 11-26<br>DSV <i>Alvin</i> Dive 4109 | 9° 50' N  | 104° 17' W | 2500      | Fluids; 25°C<br>Max 175 μM <sup>c</sup>                                          | EPR EW fluid                          |
| Mk 89, EPR                   | R/V <i>Atlantis</i><br>Cruise AT 11-26<br>DSV <i>Alvin</i> Dive 4102 | 9° 50' N  | 104° 17' W | 2500      | Bacterial filaments on<br>Vexar plastic mesh;<br>2.5°C<br>0.2-32 μM <sup>c</sup> | EPR white filament                    |

<sup>a</sup> EPR: East Pacific Rise; MAR: Mid-Atlantic Ridge

<sup>b</sup> Temperature of the hydrothermal fluid measured in-situ at the chimney orifice

<sup>c</sup> Data from Nees *et al*, 2008
