# Supplementary material
Source: PubMed Central journal article supplement (PMC4069388)
Supplement: ismej2013246x7.pdf [file ismej2013246x7.pdf]

Table S4. Primers used to amplify the *napA* gene and target sequences in the genome of representative *Alpha*, *Gamma* and *Epsilonproteobacteria*

| <b>Organism</b>                    | <b>Forward primer V16<br/>GCNCCNTGYMGNTTYTGYGG</b> | <b>Reverse primer V17<br/>RTGYTGRTTRAANCCCATNGTCCA</b> |
|------------------------------------|----------------------------------------------------|--------------------------------------------------------|
| <i>Escherichia coli</i>            | GCGCCGTGCCGTTTCTGCGG                               | ATGCTGGTTGAAGCCCATCGTCCA                               |
| <i>Paracoccus panthotrophus</i>    | GCGCCCTGCCGCTTTTGTGCGG                             | ATGCTGGTTGAAGCCCATGGTCCA                               |
| <i>Campylobacter jejuni</i>        | GCTGTTTGTAGATTTTGTGG                               | GTGTTGATTAAAGCCCATAGTCCA                               |
| <i>Helicobacter hepaticus</i>      | TCAGTATGTAGATTCTGTGG                               | GTGCTGATTCATAACCCATAGTCCA                              |
| <i>Wolinella succinogenes</i>      | TCGGTCTGTCGATTCTGCGG                               | GTGCTGATTCATTCCCATCGTCCA                               |
| <i>Sulfurimonas denitrificans</i>  | GCAGCTTGTCGTTTCTGCGG                               | ATGTTGATTCATAACCCATTGTCCA                              |
| <i>Sulfurovum</i> sp. NBC37-1      | GCAGCATGTCGTTTCTGTGG                               | GTGCTGGTTCATAACCCATTGTCCA                              |
| <i>Caminibacter mediatlanticus</i> | GCTGTTTGTAGATTTTGTGG                               | ATGTTGGTTAAATCCCATAGTCCA                               |

N=G, A, T or C; Y=C or T; M=A or C; R=G or A; H=A, C or T; S =G or C; D= G, A or T.
