# Supplementary material
Source: PubMed Central journal article supplement (PMC4069388)

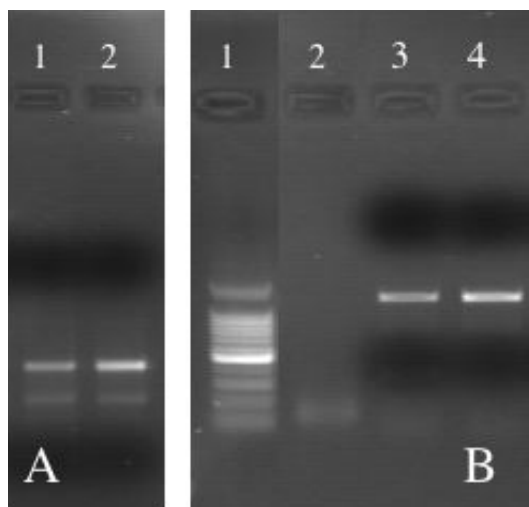

Supplement: ismej2013246x2.pdf [file ismej2013246x2.pdf]

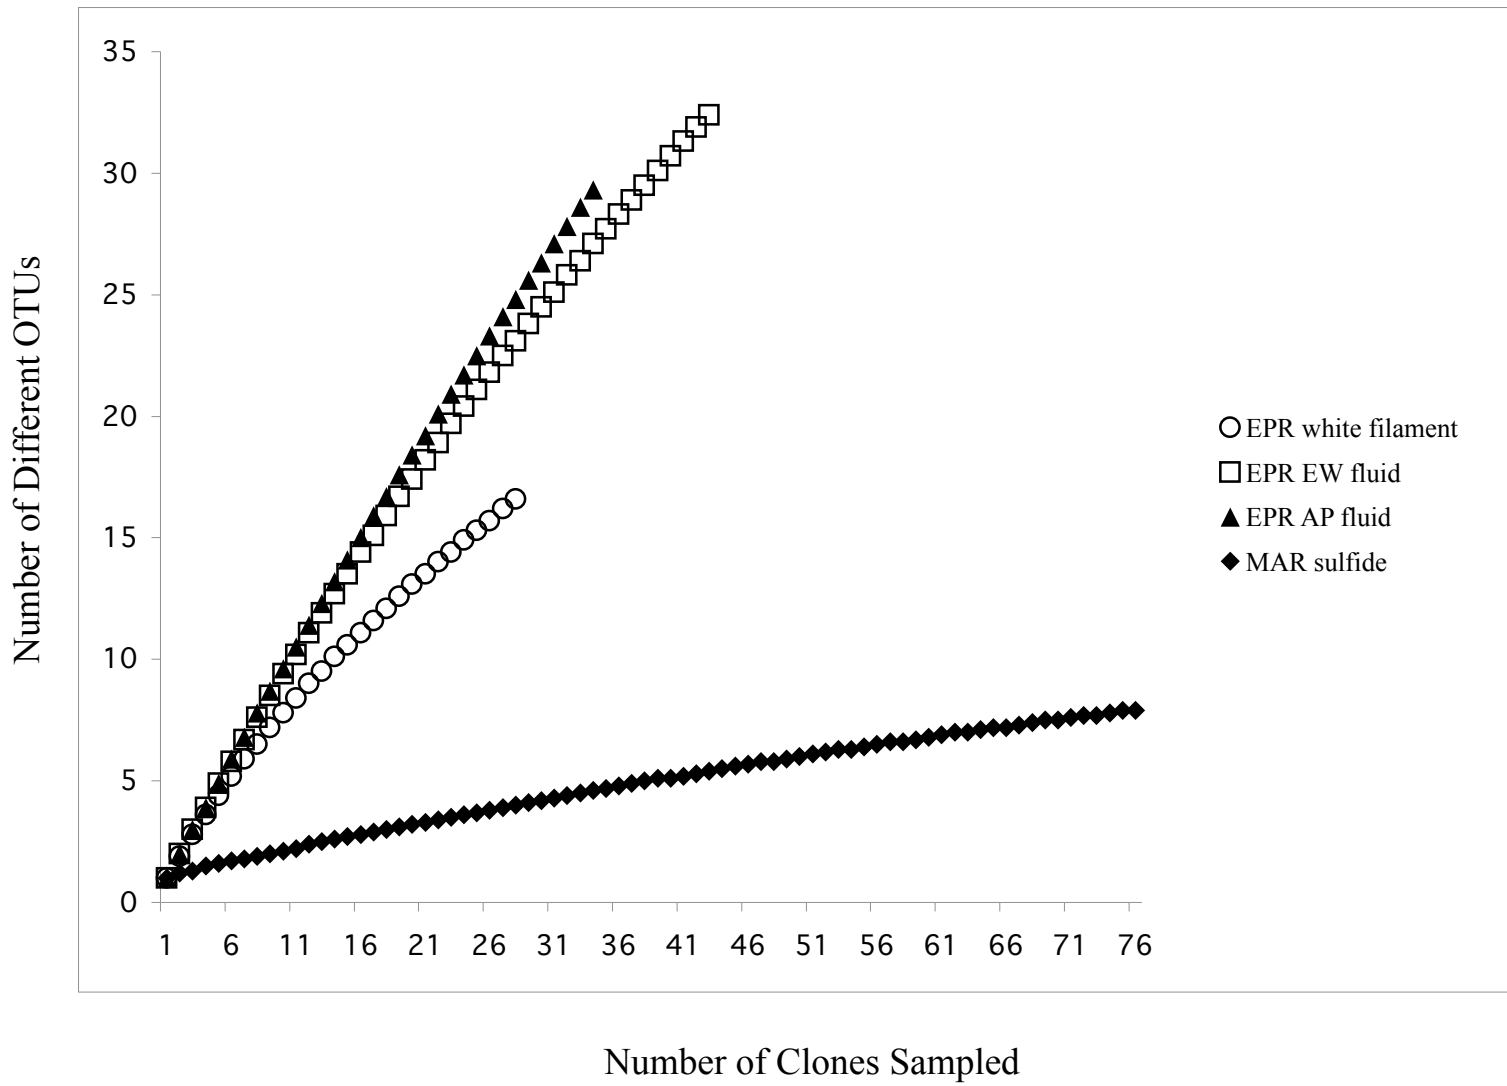

Supplement: ismej2013246x3.pdf [file ismej2013246x3.pdf]
